# Supplementary material for: Leptin regulates glutamate and glucose transporters in hypothalamic astrocytes
Source: JCI journal article supplement (doi:10.1172/jci64102), 2012-10-15
Supplement: sd1 [file 1]

Supplemental material

GFAP

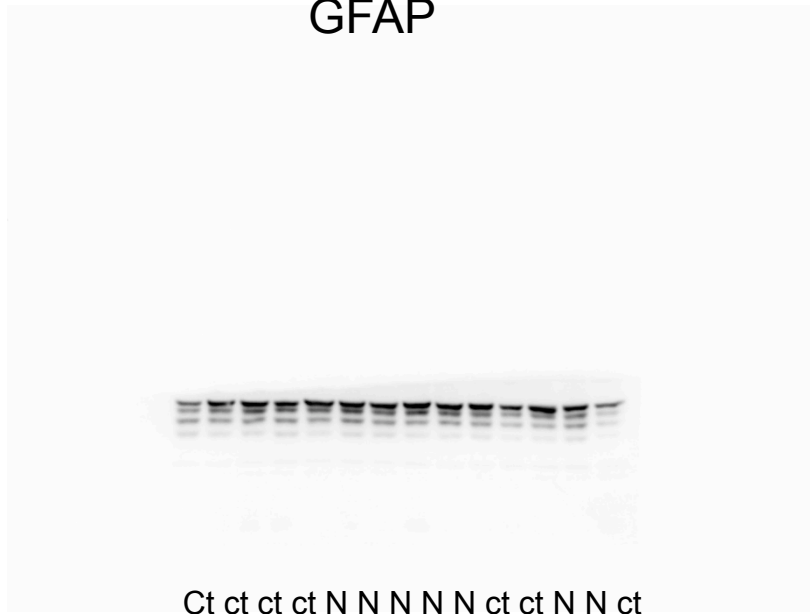

GAPDH

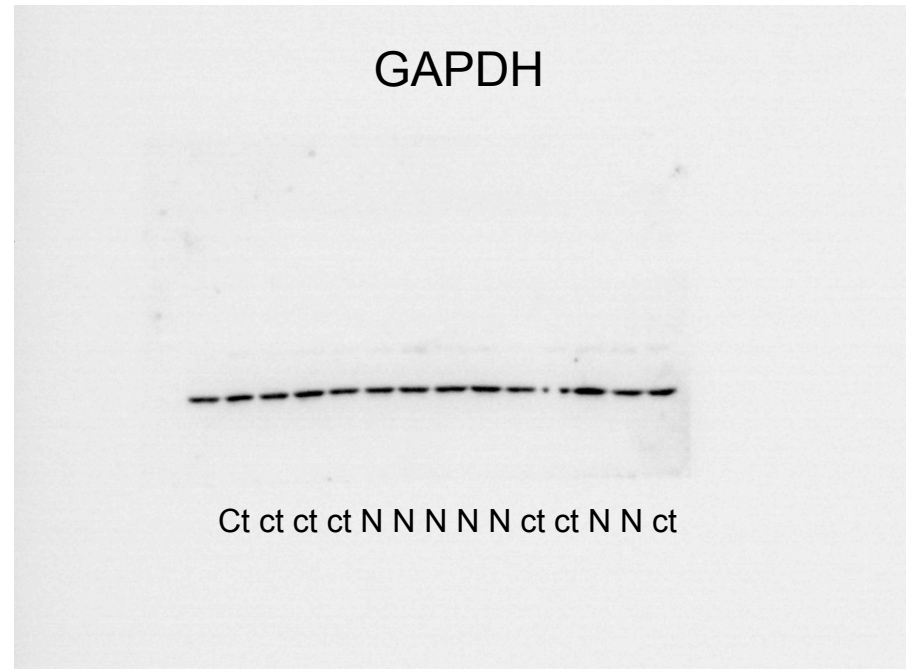

GFAP

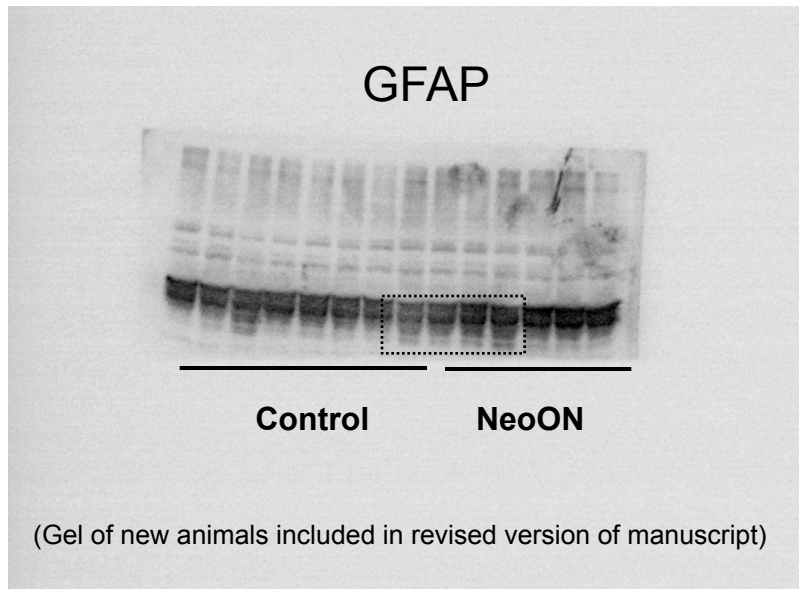

GAPDH

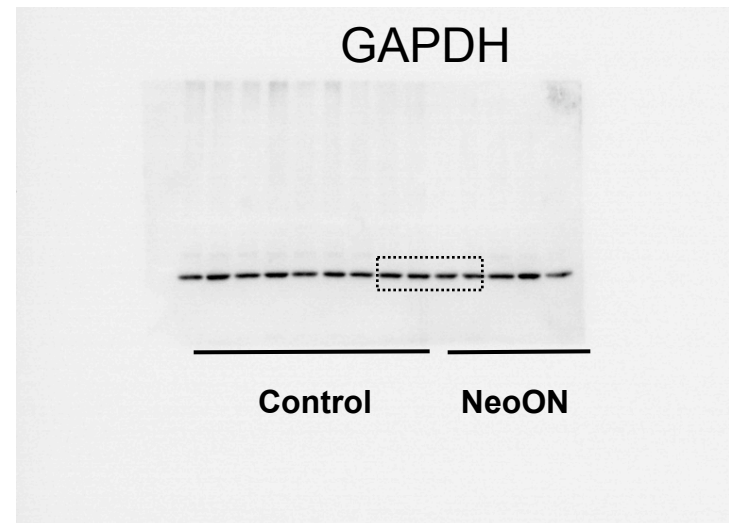

Full unedited gels for Figure 1A

Vimentin

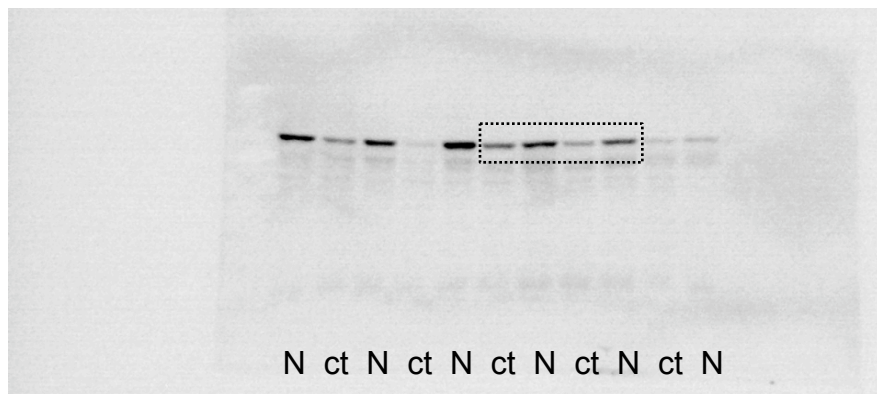

GAPDH

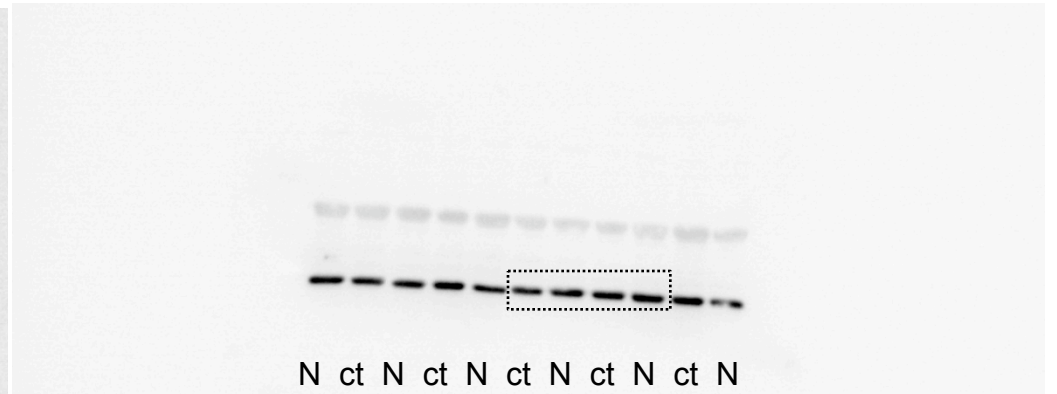

Full unedited gel for Figure 2A

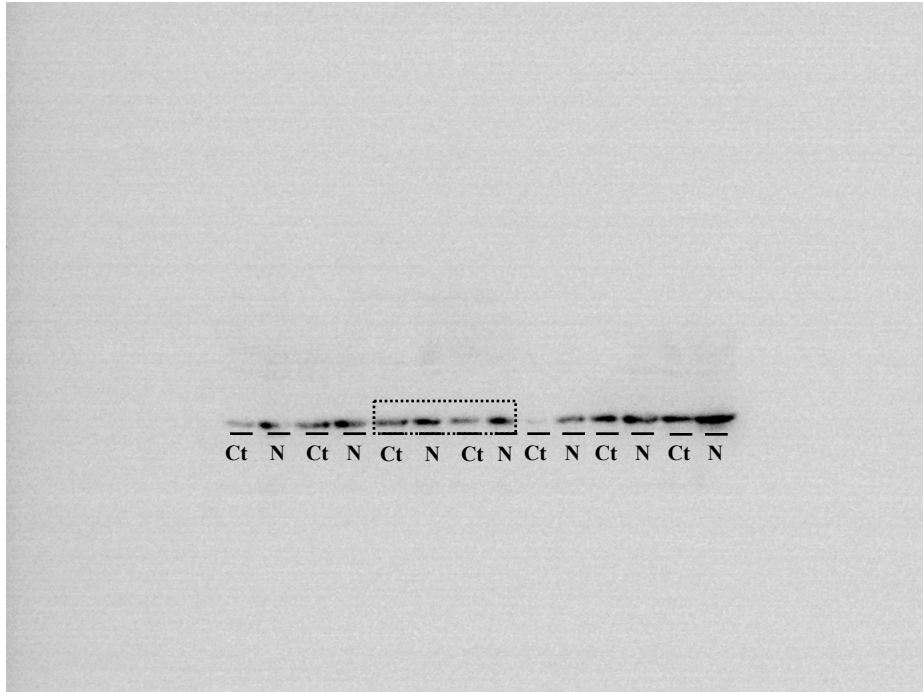

Vimentin

GADPH

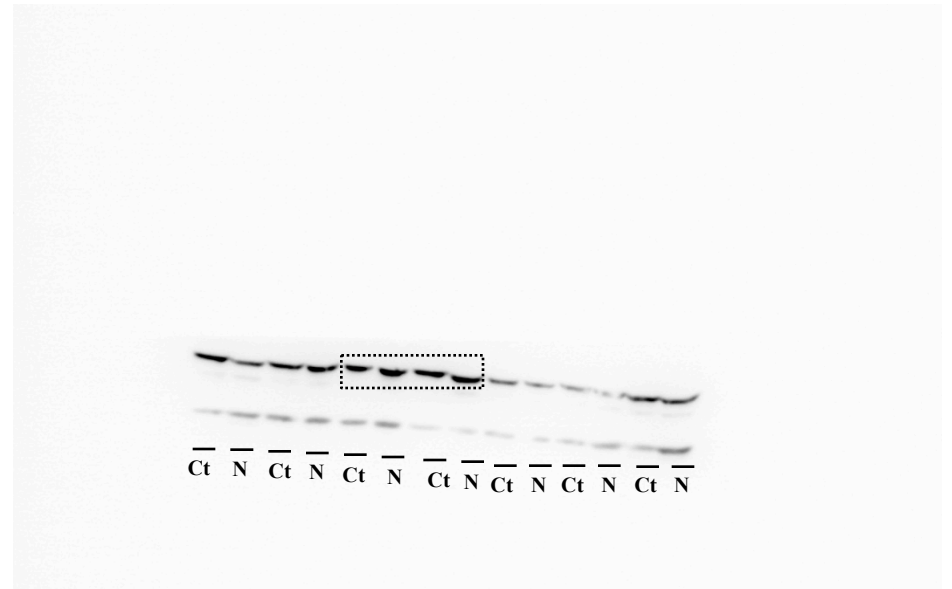

Full unedited gel for Figure 2B

GLUT1

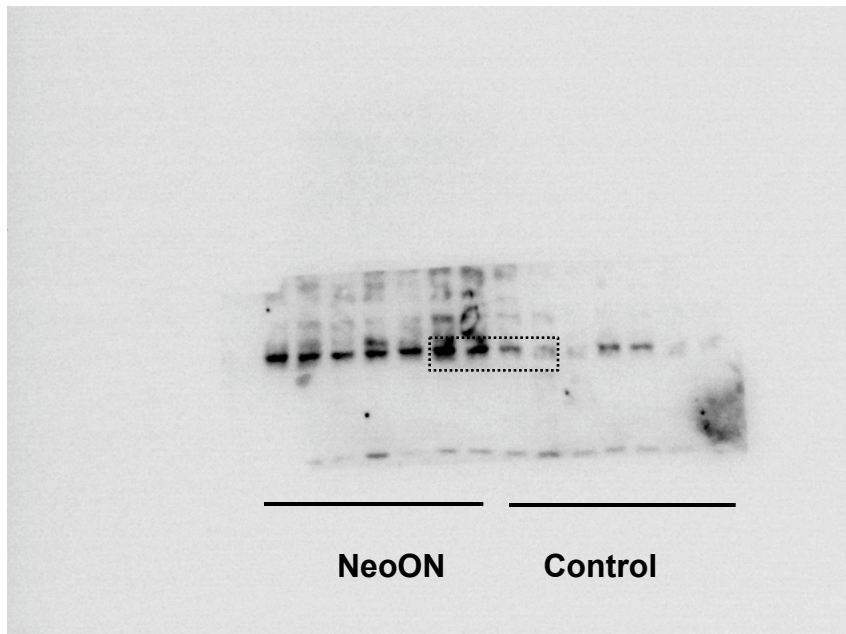

GAPDH

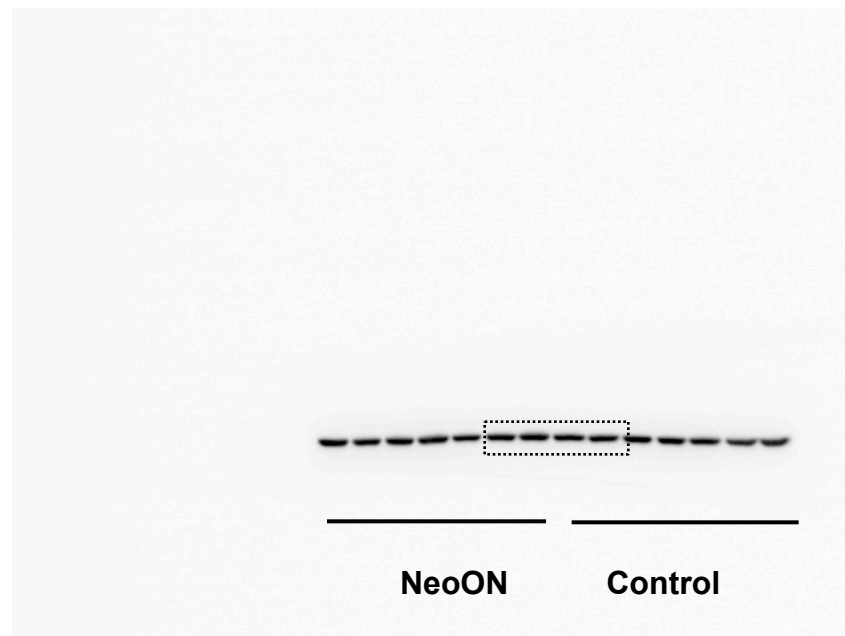

(The gel is reversed on the figure)

Full unedited gel for Figure 3A

GLUT2

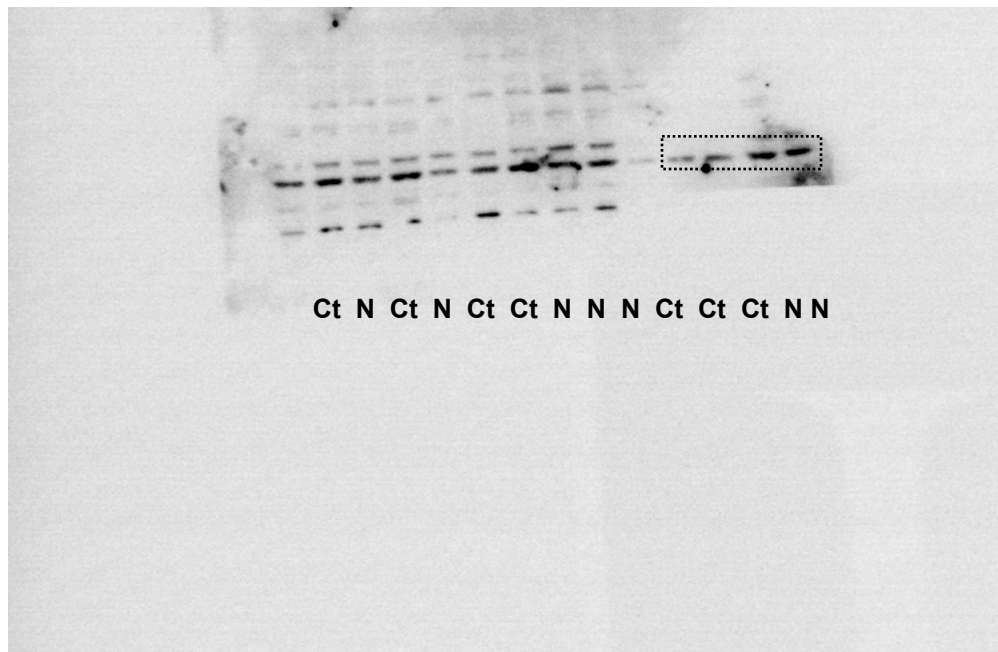

GAPDH

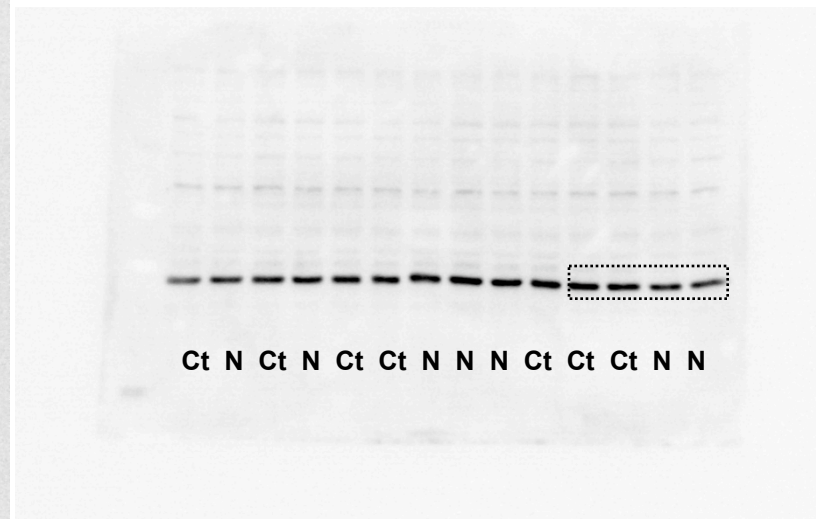

Full unedited gel for Figure 3B



GLUT3

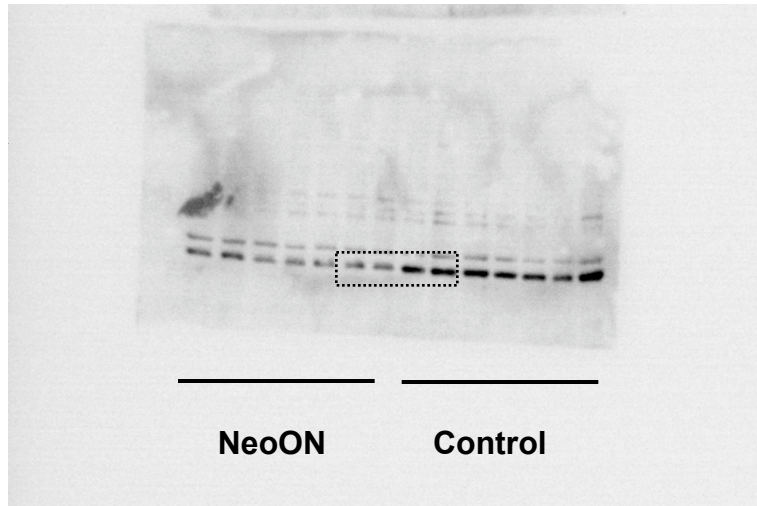

GAPDH

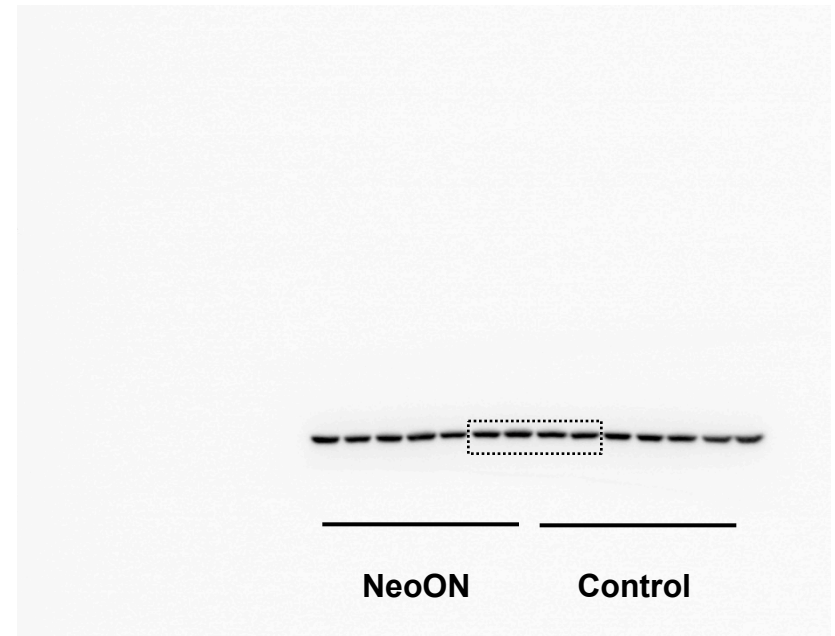

(The gel is reversed on the figure)

Full unedited gel for Figure 3C

GLAST

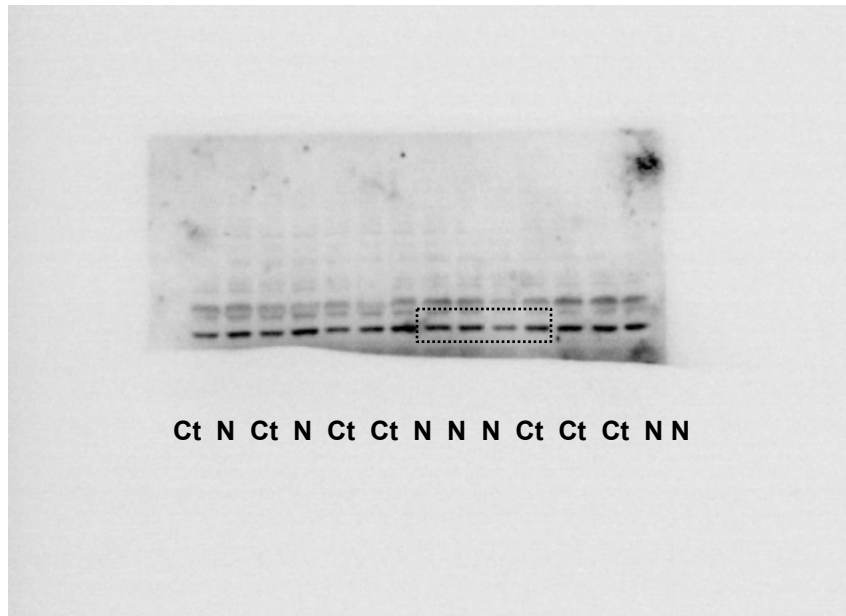

GAPDH

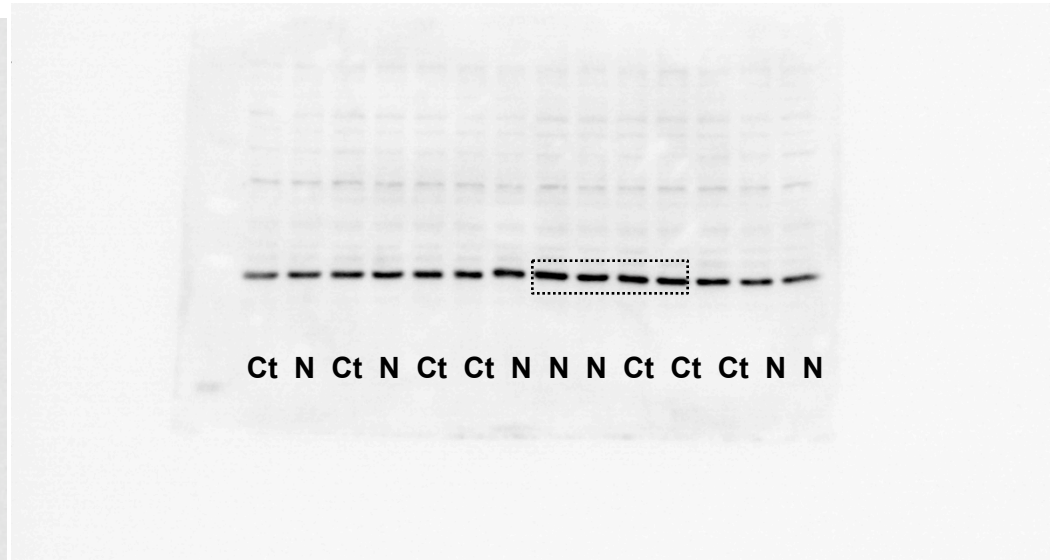

(The gel is reversed on the figure)

Full unedited gel for Figure 3D

GLT1

GAPDH

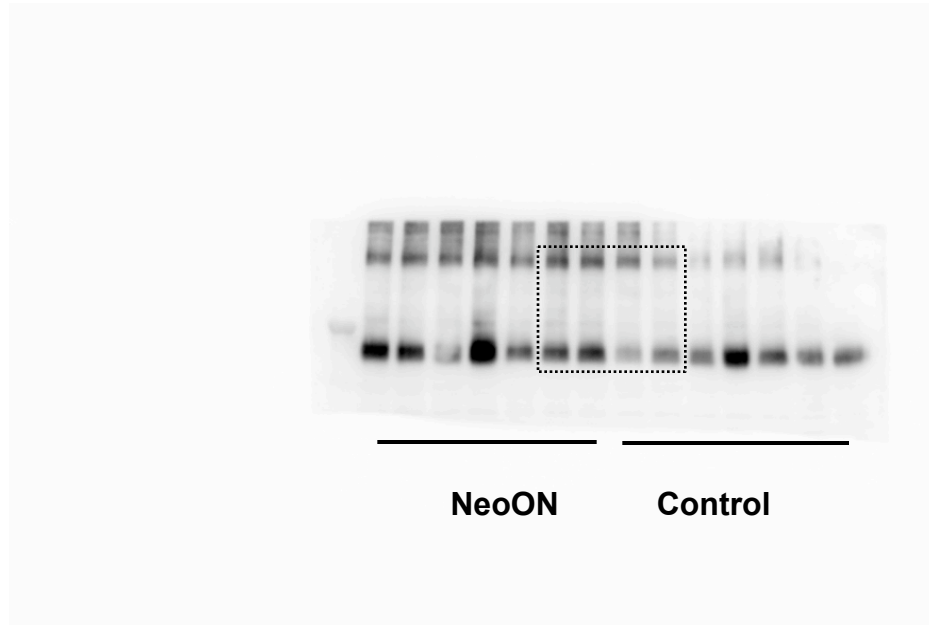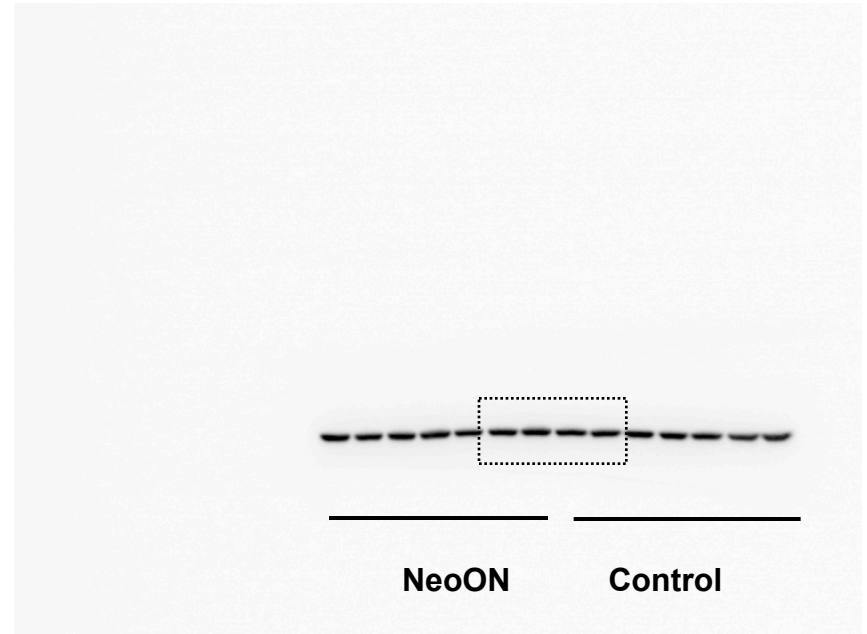

(The gel is reversed on the figure)

Full unedited gel for Figure 3E



GS

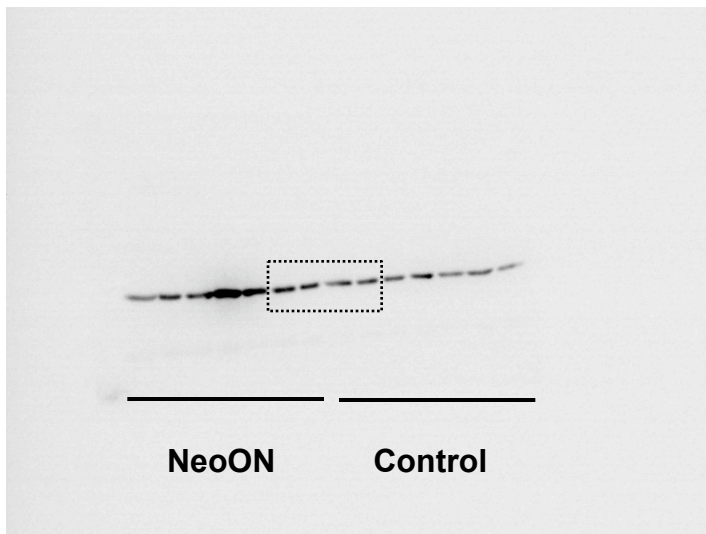

GAPDH

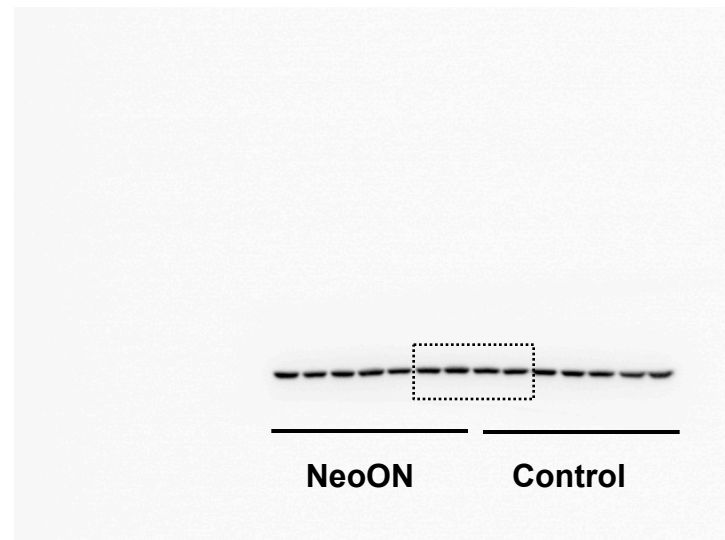

(The gel is reversed on the figure)

Full unedited gel for Figure 3F

GAD

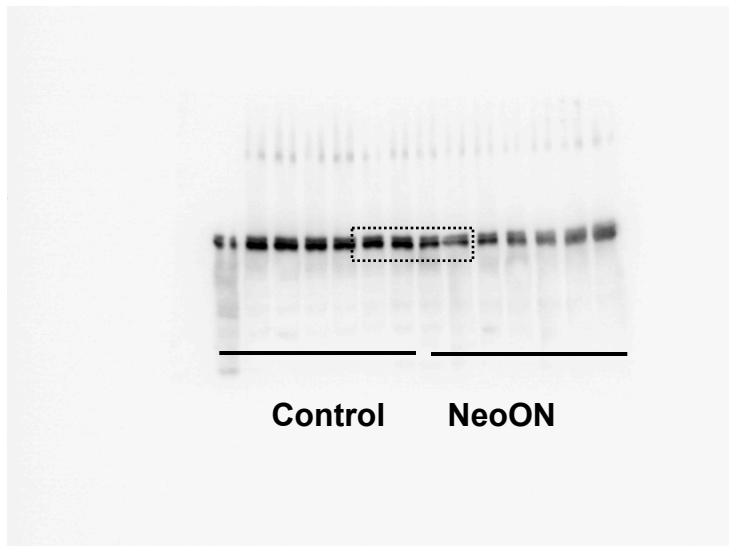

GAPDH

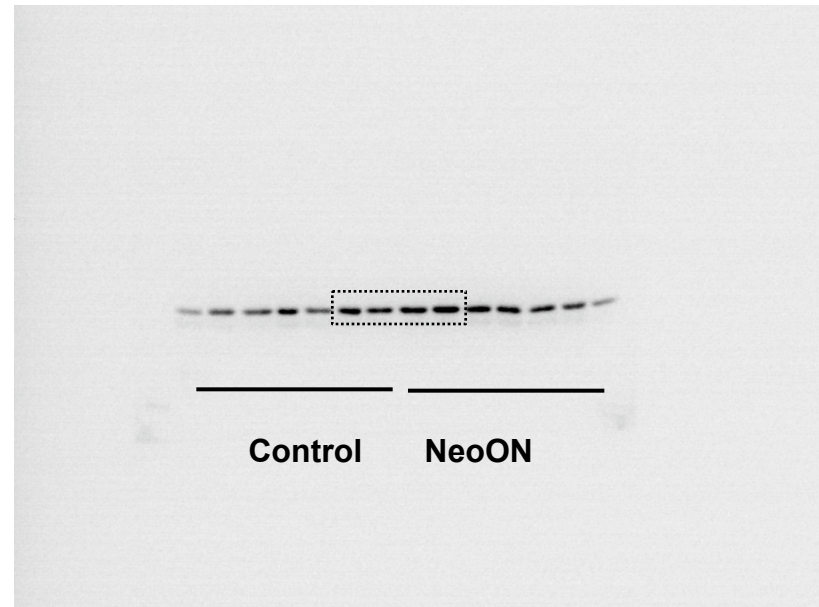

Full unedited gel for Figure 3G

GFAP

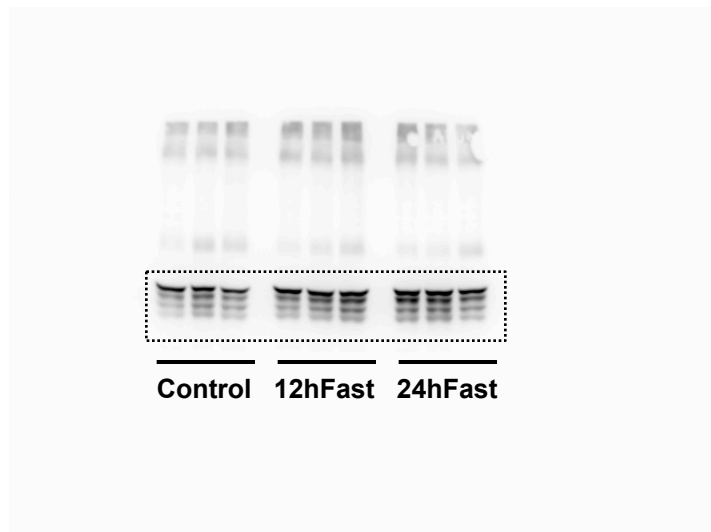

GAPDH

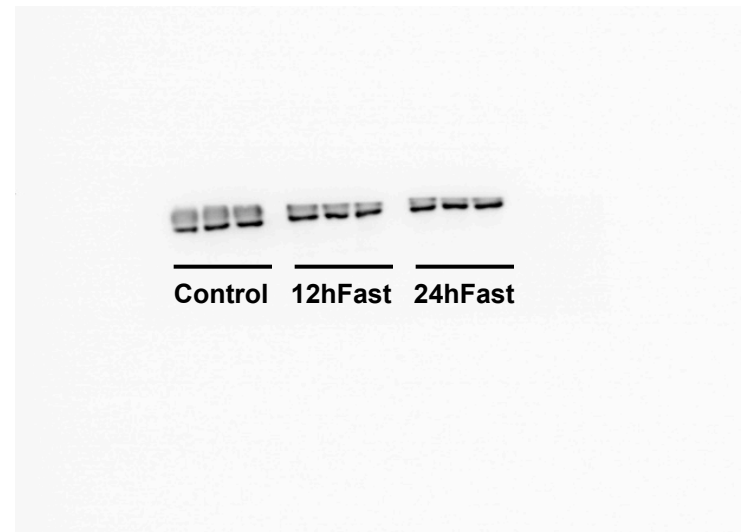

Full unedited gel for Figure 4A

VIMENTIN

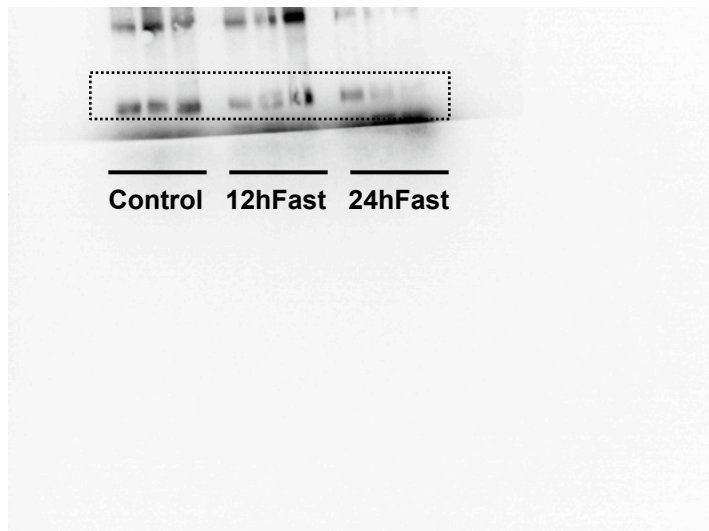

GAPDH

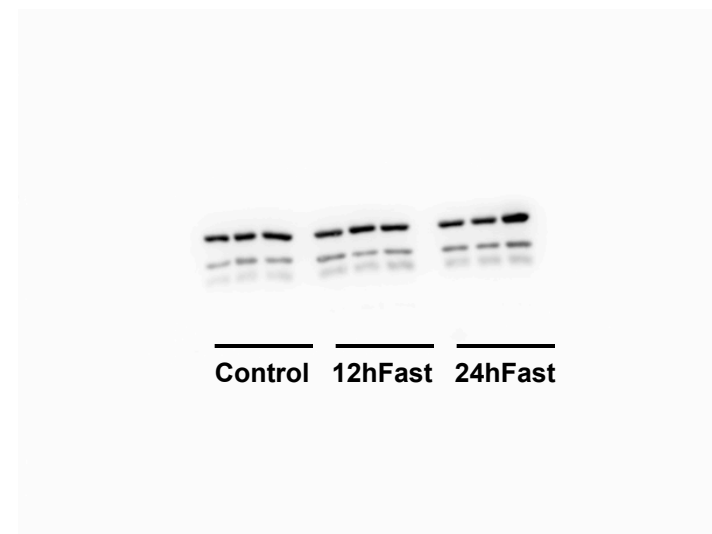

Full unedited gel for Figure 4B

GLUT1

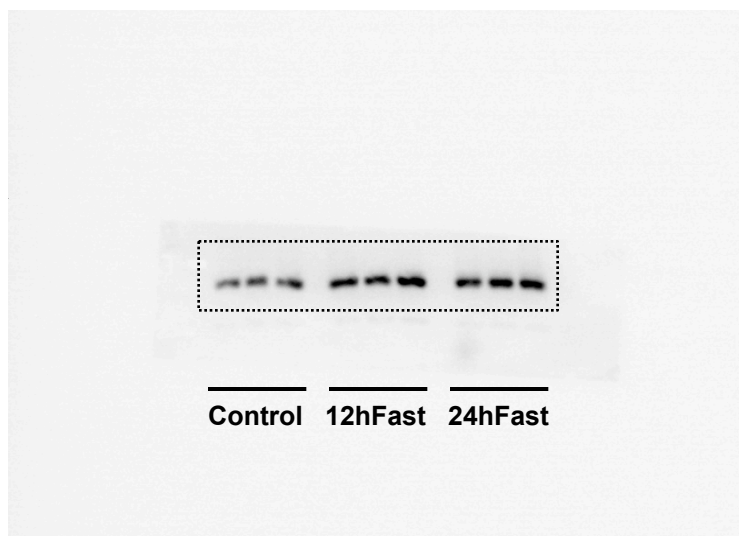

GAPDH

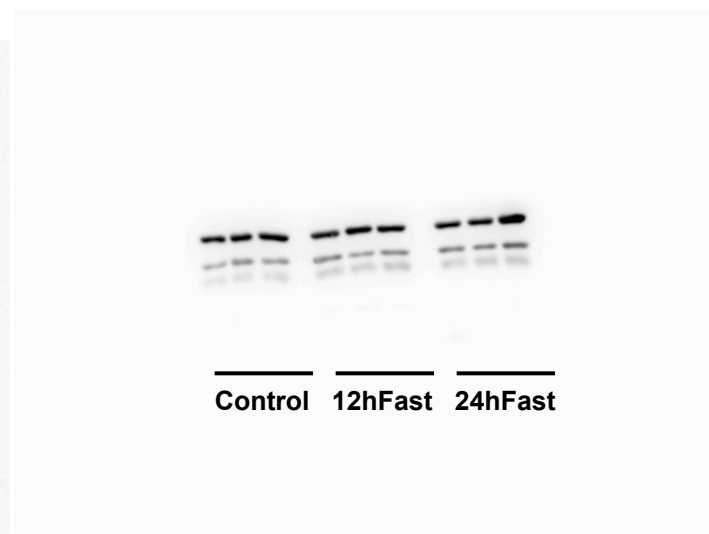

Full unedited gel for Figure 4C

GLUT2

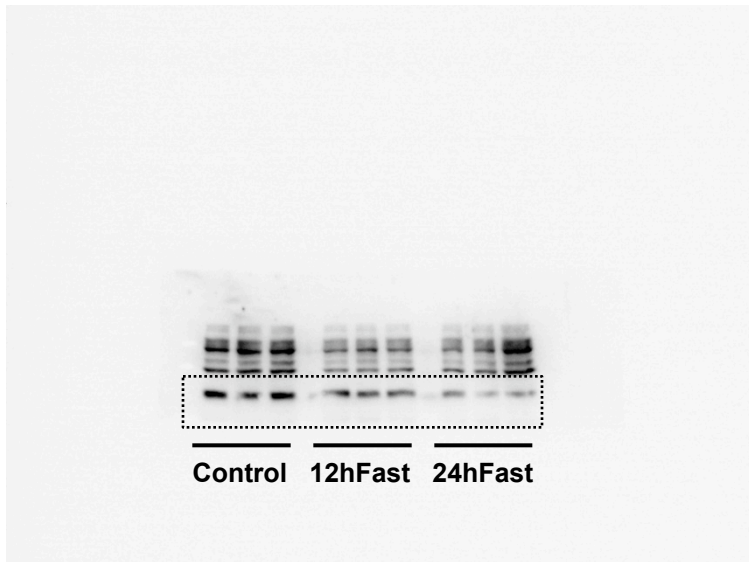

GAPDH

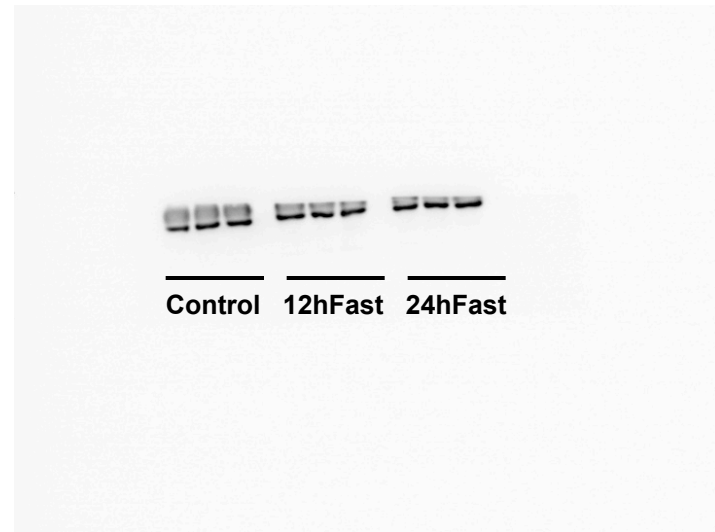

Full unedited gel for Figure 4D



GLUT3

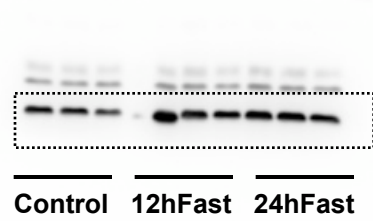

GAPDH

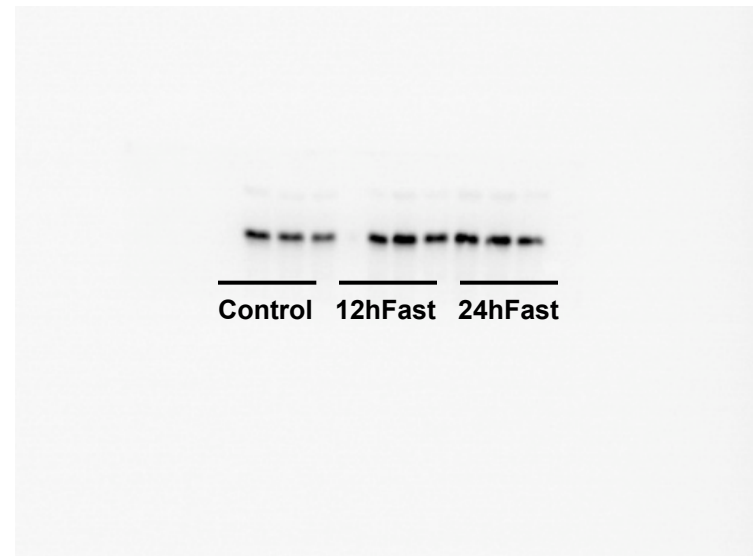

Full unedited gel for Figure 4E

GLAST

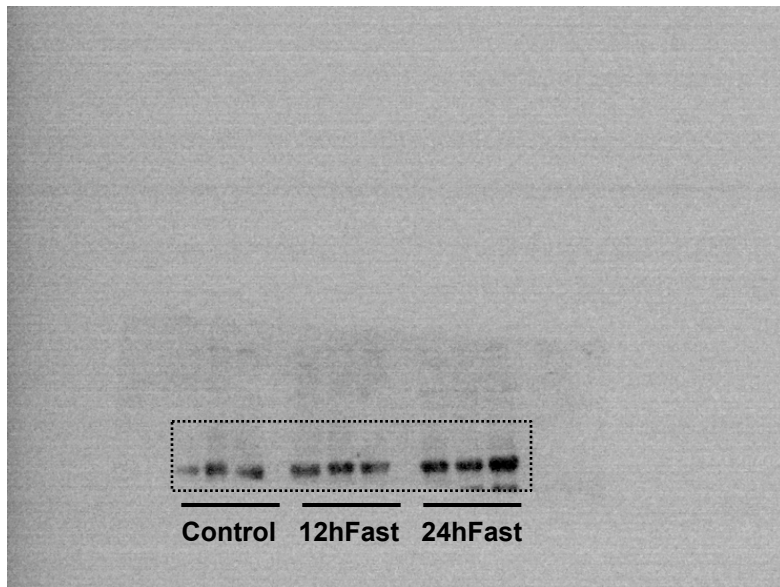

GAPDH

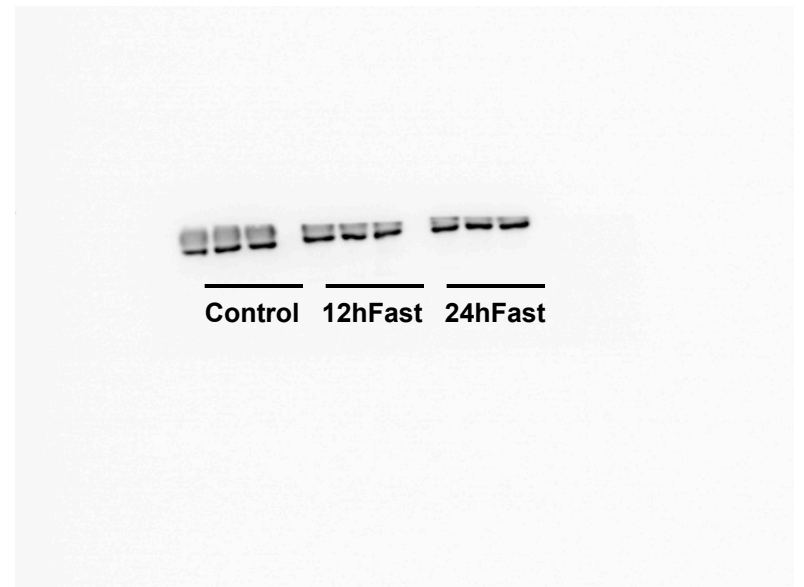

Full unedited gel for Figure4F

GLUT2

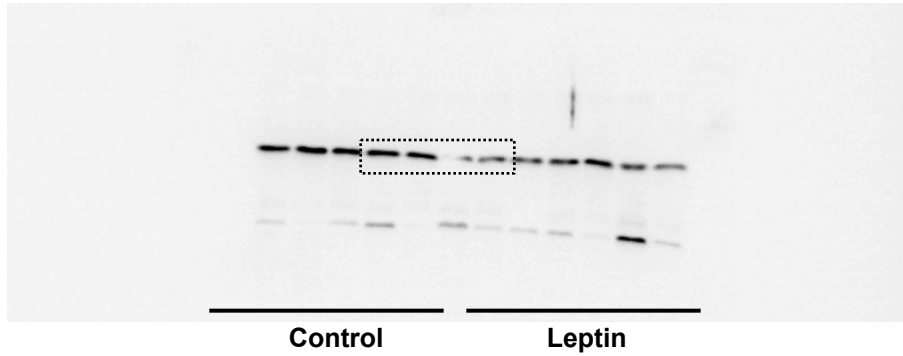

GAPDH

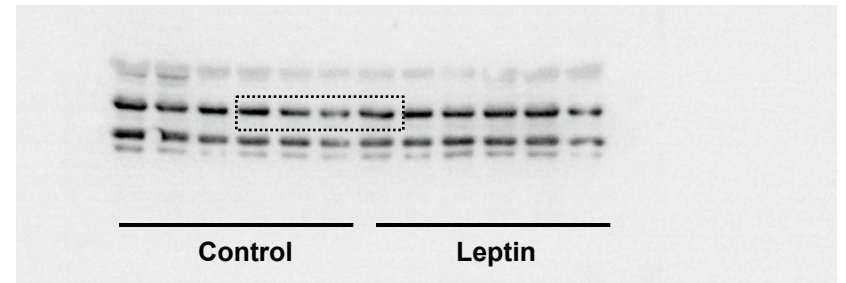

Full unedited gel for Figure5A

GLUT3

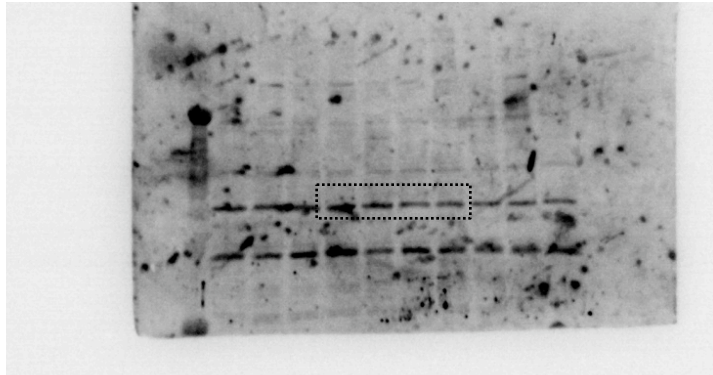

Control

Leptin

GAPDH

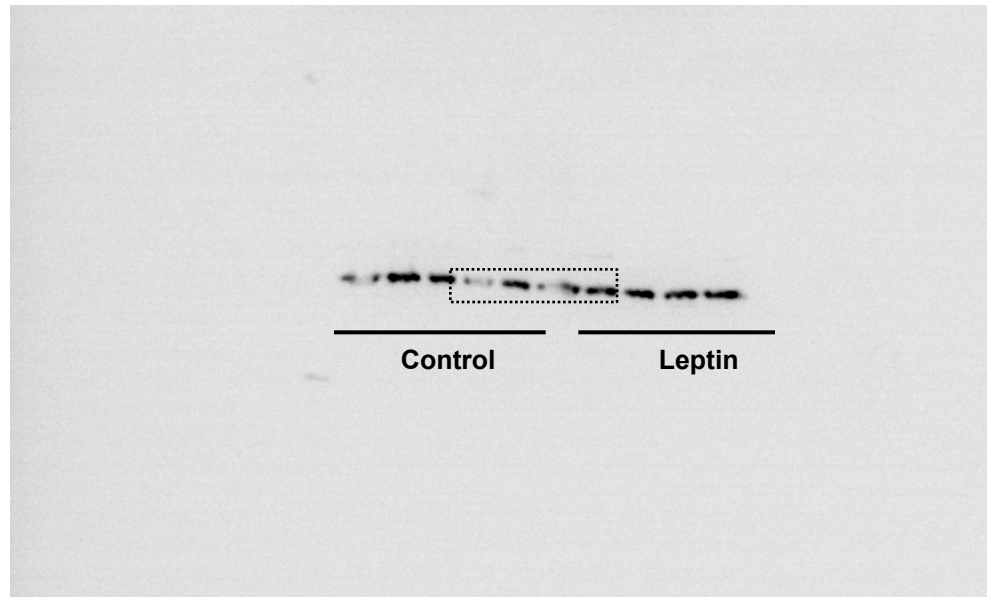

Control

Leptin

Full unedited gel for Figure5B

GLAST

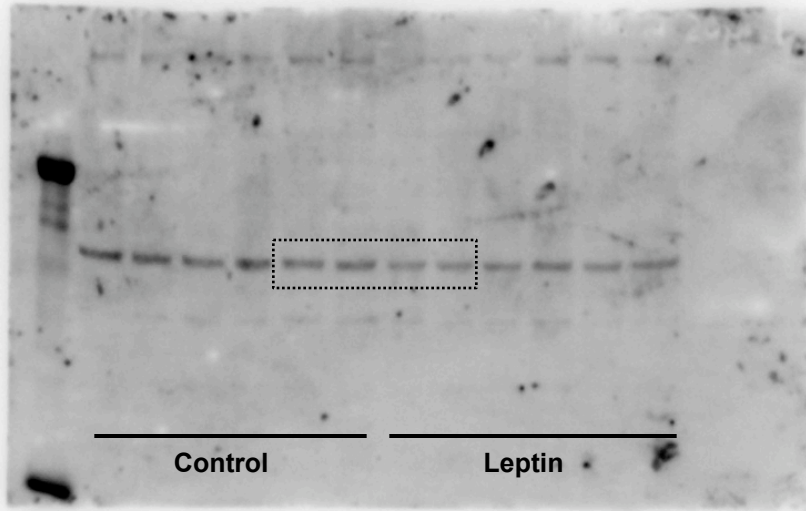

GAPDH

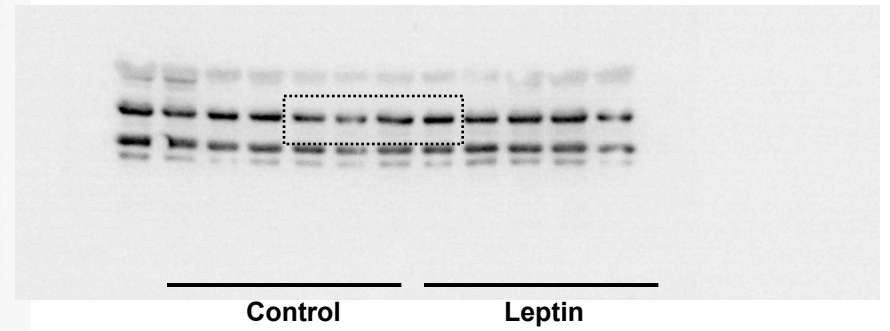

Full unedited gel for Figure5C

GLAST

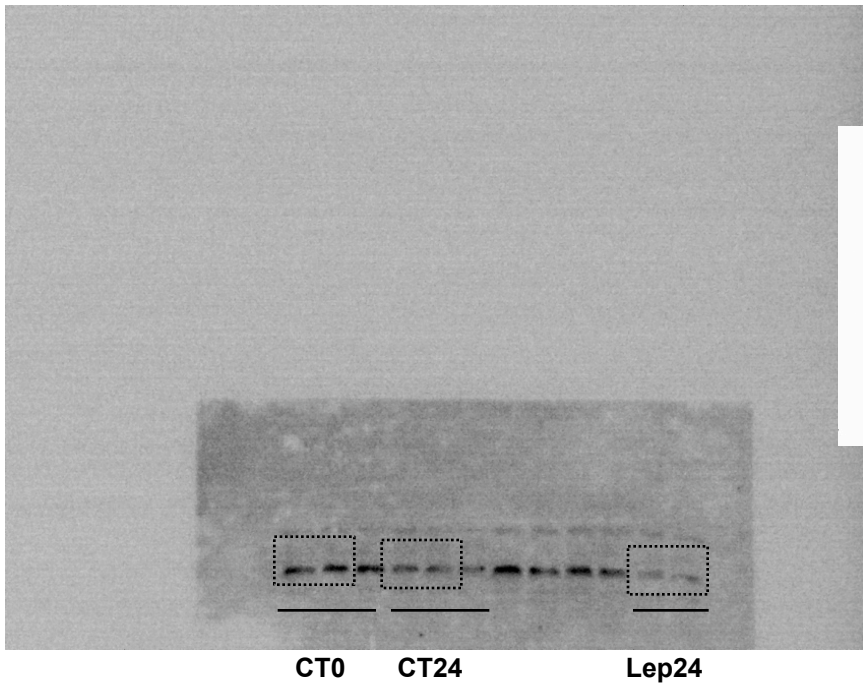

GAPDH

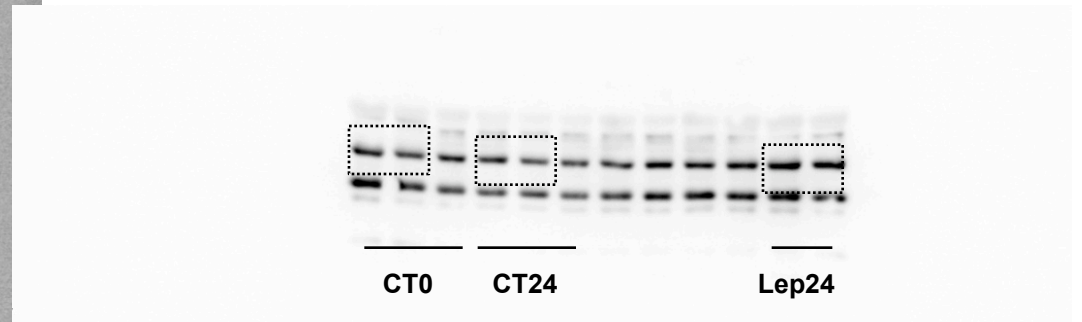

Full unedited gel for Figure5D



GLT1

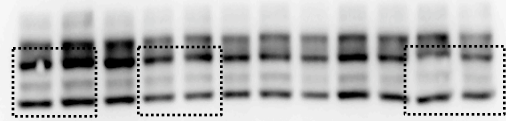

CT0

CT24

Lep24

GAPDH

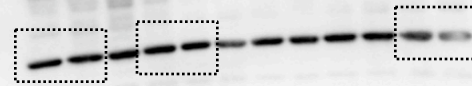

CT0

CT24

Lep24

Full unedited gel for Figure5E

GLAST  
membrane fraction (5H)

GLAST  
total protein (5G)

GAPDH  
membrane fraction (5H)

GAPDH  
total protein (5G)

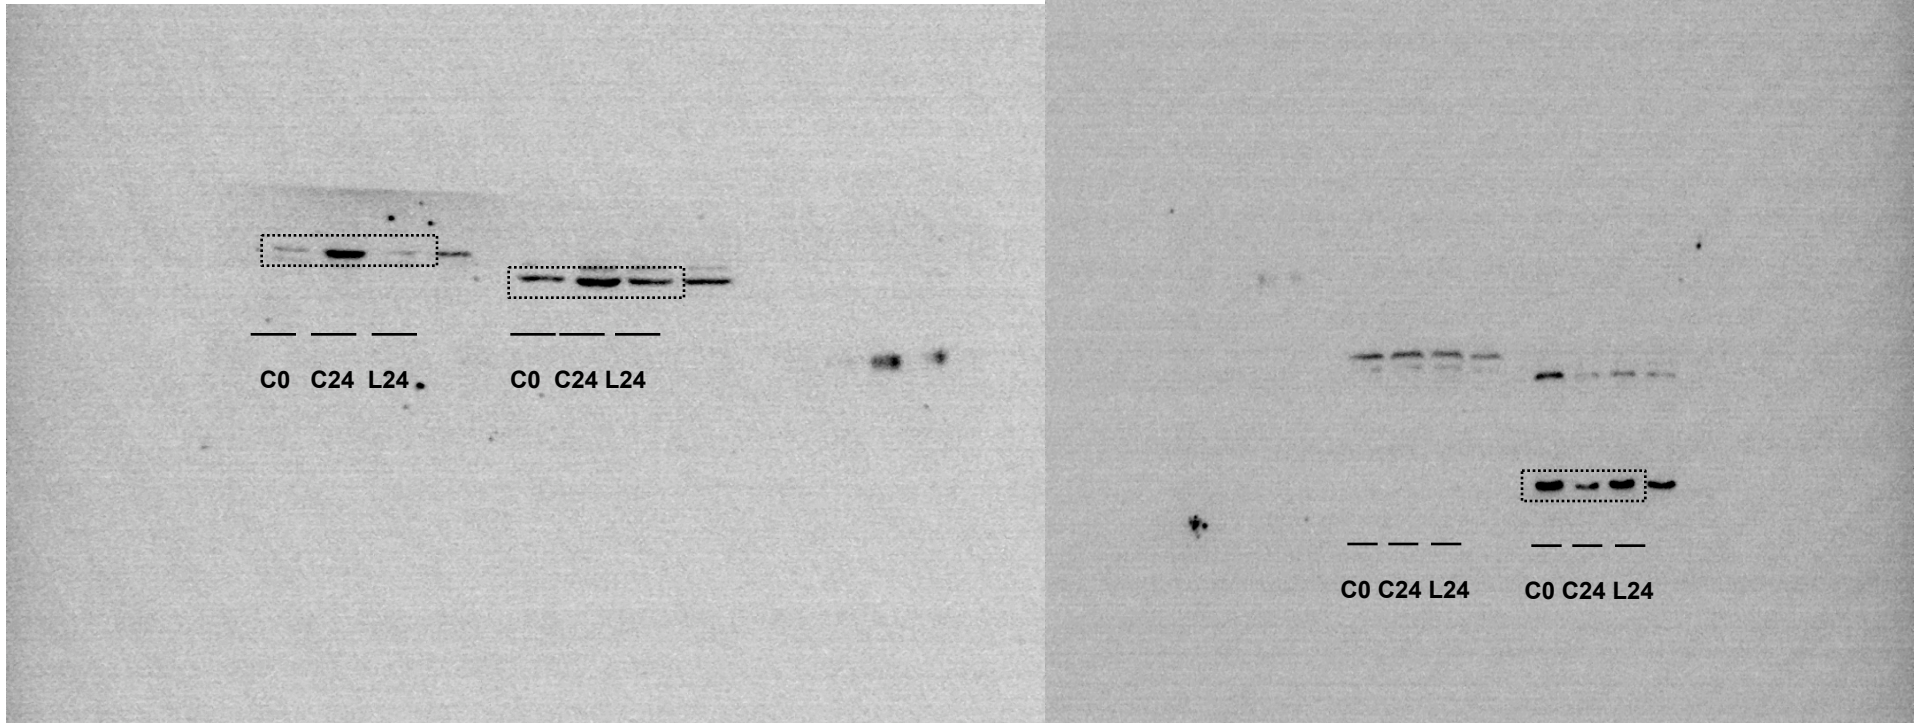

Full unedited gel for Figure 5 G and H

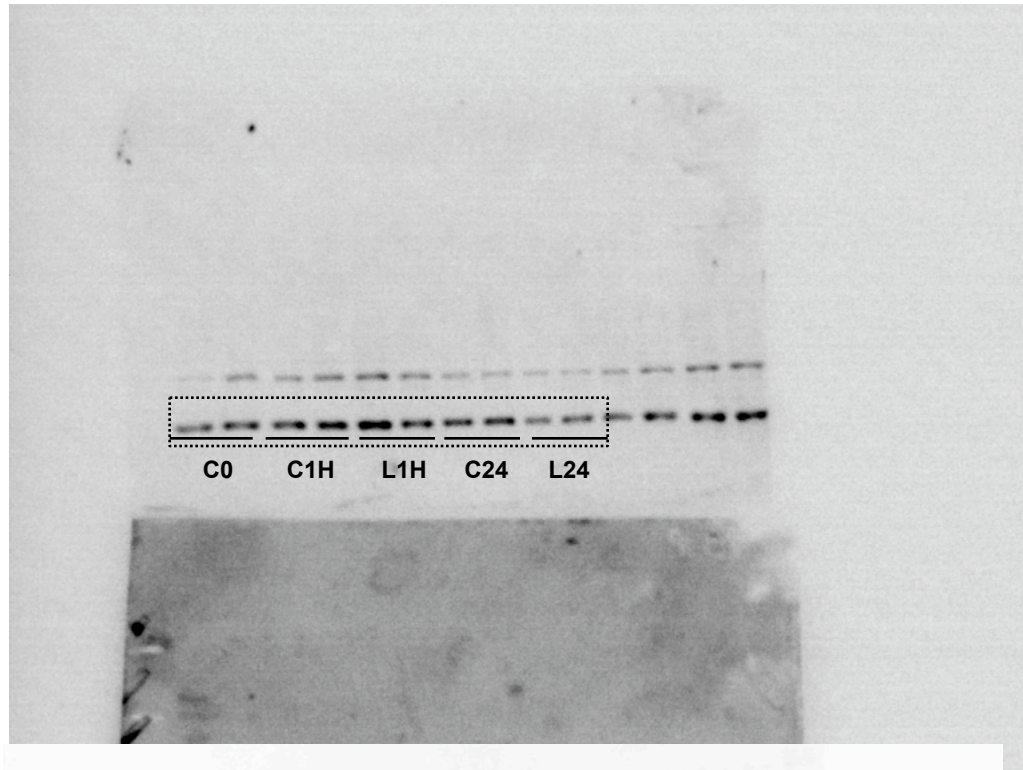

GLAST

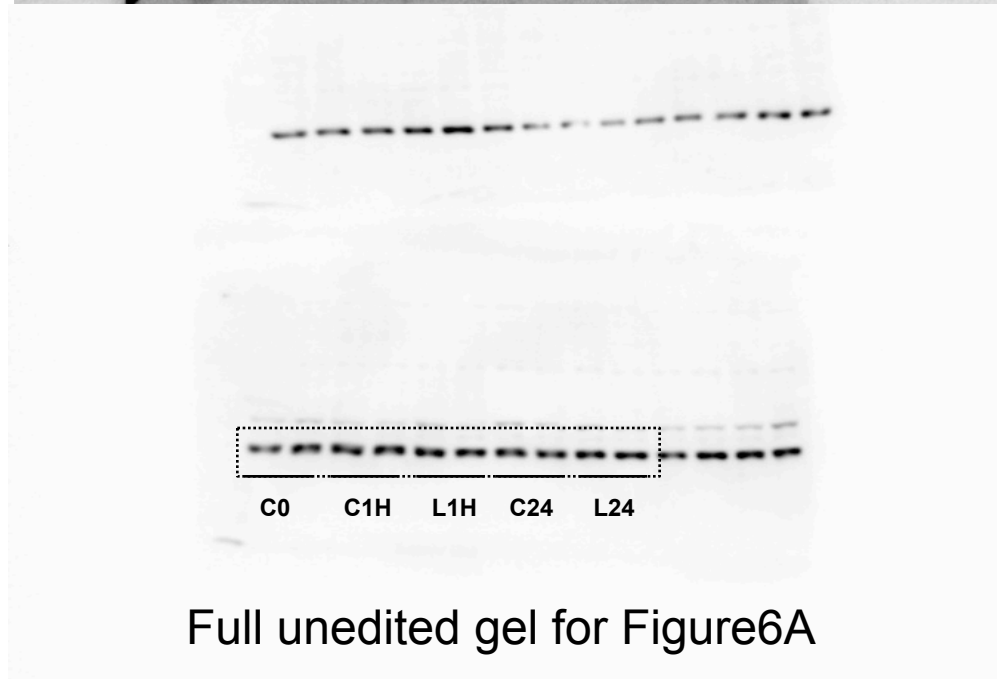

GAPDH

Full unedited gel for Figure6A

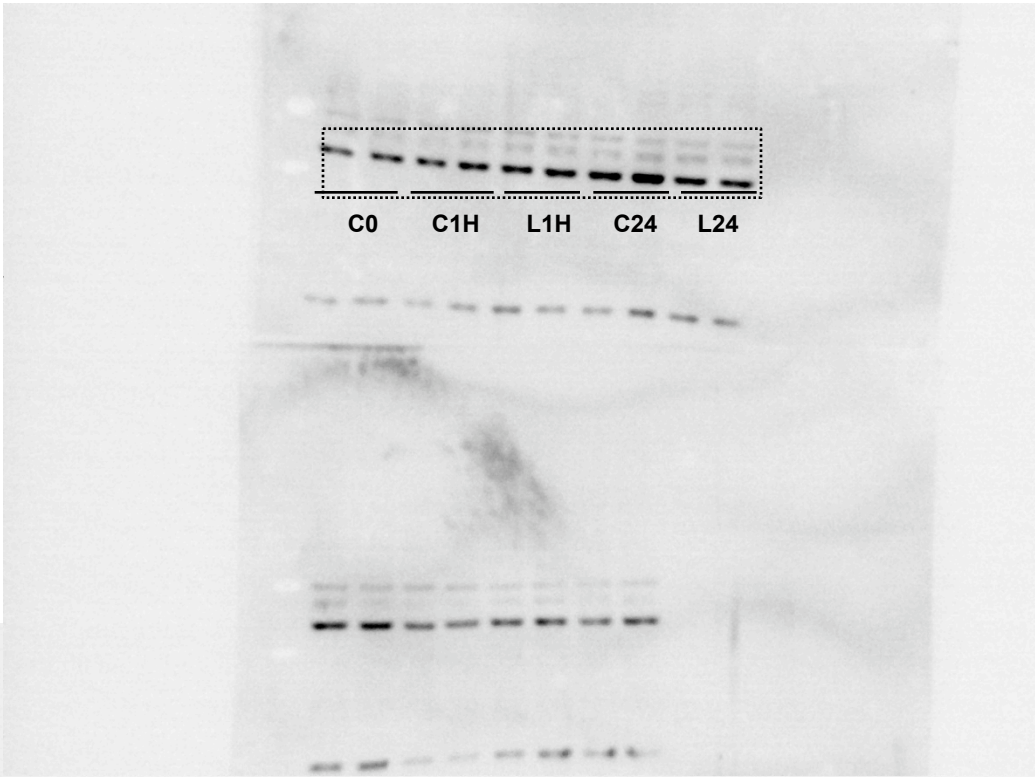

GLUT-2

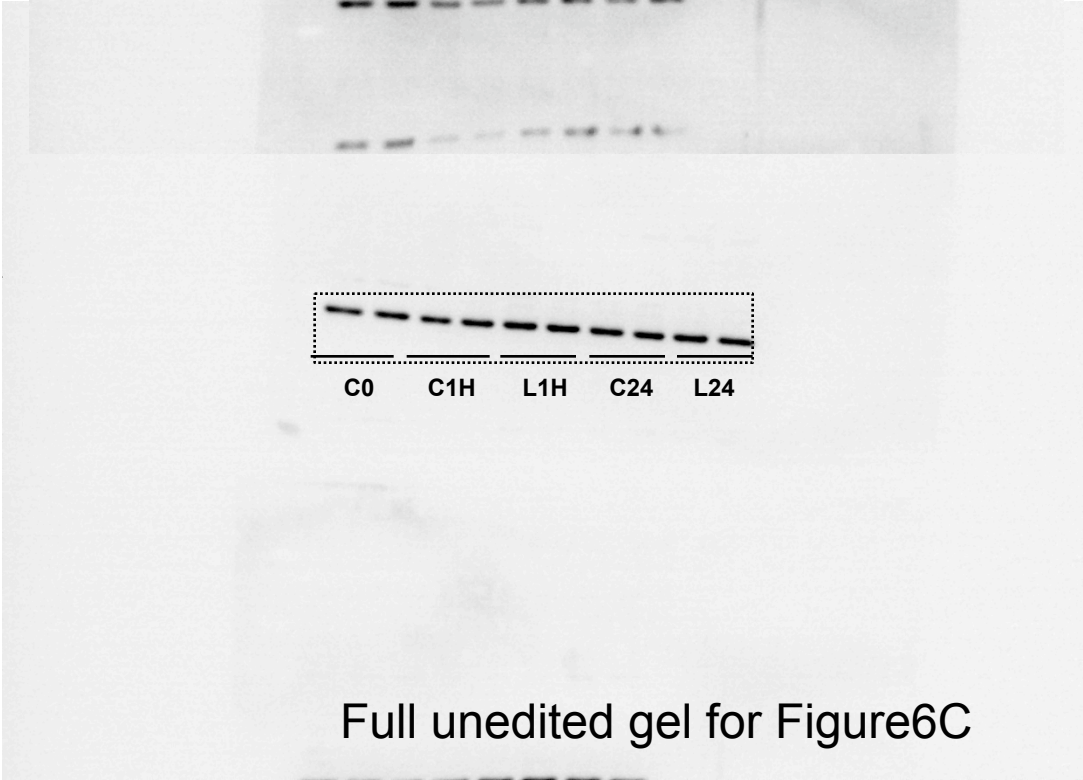

GAPDH

Full unedited gel for Figure6C
